# Supplementary material for: Flower-like 1T-MoS2/NiCo2S4on a carbon cloth substrate as an efficient electrocatalyst for the hydrogen evolution reaction
Source: Royal Society of Chemistry journal article supplement (doi:10.1039/d1dt01948a), 2021-01-01
Supplement: d1dt01948a1.pdf [file d1dt01948a1.pdf]

Electronic supplementary information for

Flower-Like 1T-MoS<sub>2</sub>/NiCo<sub>2</sub>S<sub>4</sub> on carbon cloth substrate as an efficient electrocatalyst for the  
hydrogen evolution reaction

Meng Zheng,<sup>[a]</sup> Qianqiao Chen\*<sup>[a]</sup> and Qin Zhong<sup>[a]</sup>

<sup>a</sup>School of Chemical Engineering, Nanjing University of Science and Technology Nanjing 210094,  
China

\*Corresponding author

E-mail address: [cqq@njut.edu.cn](mailto:cqq@njut.edu.cn)

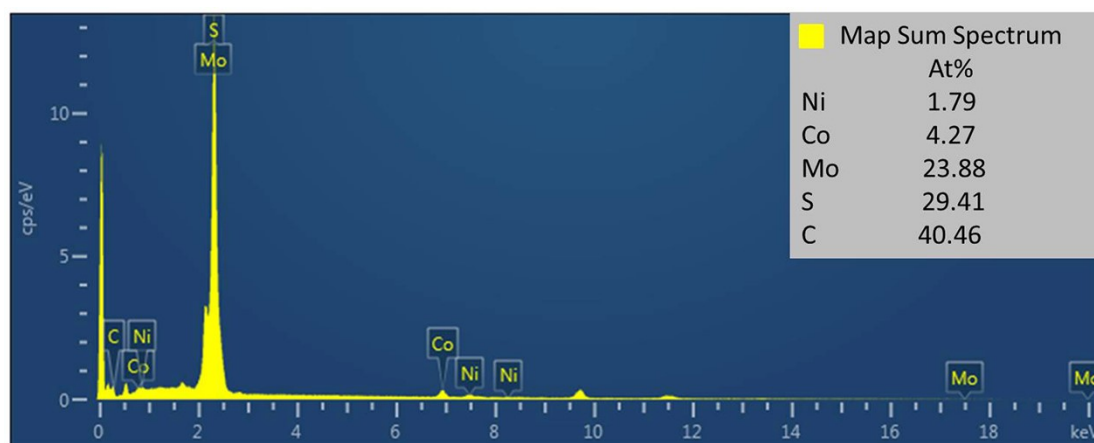

Figure S1. EDS spectrum of 1T-MoS<sub>2</sub>/NiCo<sub>2</sub>S<sub>4</sub>/CC.

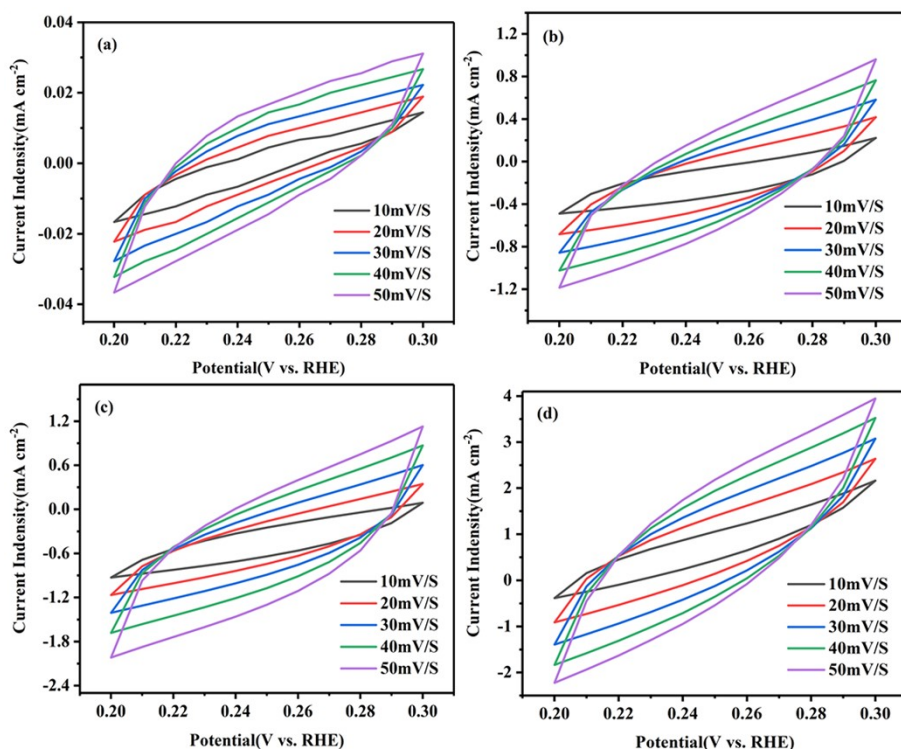

**Figure S2.** CV curves of (a) NiCo-LDH/CC, (b) NiCo<sub>2</sub>S<sub>4</sub>/CC, (c) MoS<sub>2</sub>/CC and (d) 1T-MoS<sub>2</sub>/NiCo<sub>2</sub>S<sub>4</sub>

/CC in 1 M KOH.

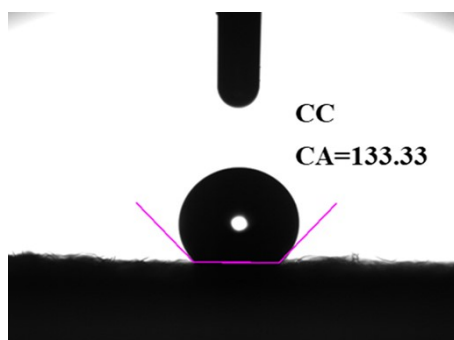

**Figure S3.** Contact angle tests of CC.

**Table S1.** Comparison of the HER performance of 1T-MoS<sub>2</sub>/NiCo<sub>2</sub>S<sub>4</sub>/CC with previously reported electrocatalysts.

| Catalysts                                                 | Overpotential (mV)<br>(at 10mA cm <sup>-2</sup> ) | Tafel slope<br>(mV dec <sup>-1</sup> ) | Electrolytes                         | Reference |
|-----------------------------------------------------------|---------------------------------------------------|----------------------------------------|--------------------------------------|-----------|
| 1T-MoS <sub>2</sub> /NiCo <sub>2</sub> S <sub>4</sub> /CC | 107                                               | 66.4                                   | 1.0 M KOH                            | This work |
| 1T-MoS <sub>2</sub> /NiS <sub>2</sub>                     | 116                                               | 72                                     | 1.0 M KOH                            | Ref. 22   |
| 1T-MoS <sub>2</sub> /G/NF                                 | 117                                               | 38                                     | 0.5 M H <sub>2</sub> SO <sub>4</sub> | Ref. 17   |
| 1T/2H-MoS <sub>2</sub> -HN                                | 156                                               | 47.9                                   | 0.5 M H <sub>2</sub> SO <sub>4</sub> | Ref. 36   |
| 2H-1T MoS <sub>2</sub>                                    | 194.8                                             | 113.1                                  | 0.5 M H <sub>2</sub> SO <sub>4</sub> | Ref. 14   |
| S-nMoS <sub>2</sub>                                       | 252                                               | 45                                     | 0.5 M H <sub>2</sub> SO <sub>4</sub> | Ref. 15   |
| Mo-C/N@MoS <sub>2</sub>                                   | 117                                               | 64.3                                   | 1.0 M KOH                            | Ref. 5    |

|                                                                      |       |       |                                      |         |
|----------------------------------------------------------------------|-------|-------|--------------------------------------|---------|
| MoS <sub>2</sub> /RGO-180                                            | 213   | 43    | 0.5 M H <sub>2</sub> SO <sub>4</sub> | Ref. 23 |
| MoS <sub>2</sub> /graphene/NF                                        | 89    | 45    | 0.5 M H <sub>2</sub> SO <sub>4</sub> | Ref. 3  |
| NiCo <sub>2</sub> S <sub>4</sub> /Ni <sub>3</sub> S <sub>2</sub> /NF | 119   | 105.2 | 1.0 M KOH                            | Ref. 38 |
| NiCo/NiCo <sub>2</sub> S <sub>4</sub> @NiCo/NF                       | 132   | 58.2  | 1.0 M KOH                            | Ref. 28 |
| MoS <sub>2</sub> /NiCo <sub>2</sub> S <sub>4</sub> /CFP              | 139.6 | 37.7  | 0.5 M H <sub>2</sub> SO <sub>4</sub> | Ref. 43 |
| CoNi <sub>2</sub> S <sub>4</sub> /Ni <sub>3</sub> S <sub>2</sub> @NF | 171   | 88.6  | 1.0 M KOH                            | Ref. 30 |

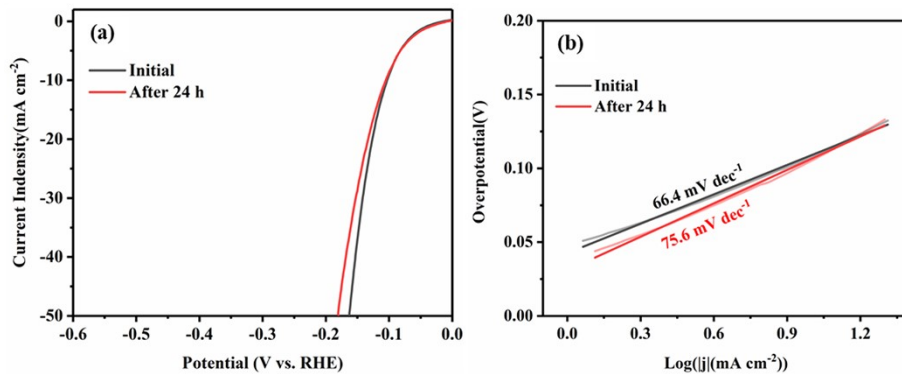

**Figure S4.** (a) LSV curves (b) The Tafel slopes of the 1T-MoS<sub>2</sub>/NiCo<sub>2</sub>S<sub>4</sub>/CC composite before and after the chronoamperometry test for 24 h.

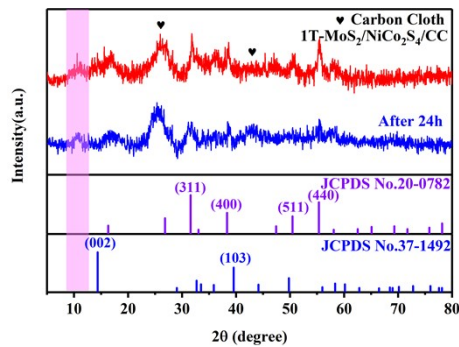

**Figure S5.** XRD patterns of the 1T-MoS<sub>2</sub>/NiCo<sub>2</sub>S<sub>4</sub>/CC composite before and after the chronoamperometry test for 24 h.

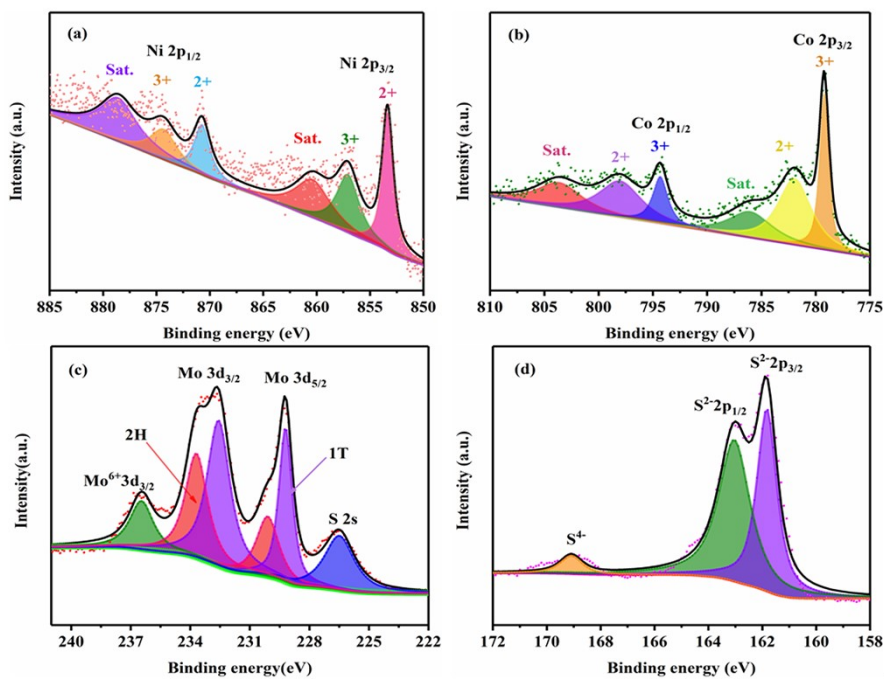

**Figure S6.** High-resolution XPS spectra of (a) Ni 2p. (b) Co 2p. (c) Mo 3d and (d) S 2p of 1T-MoS<sub>2</sub>/NiCo<sub>2</sub>S<sub>4</sub>/CC after the chronoamperometry test for 24 h in 1.0 M KOH.

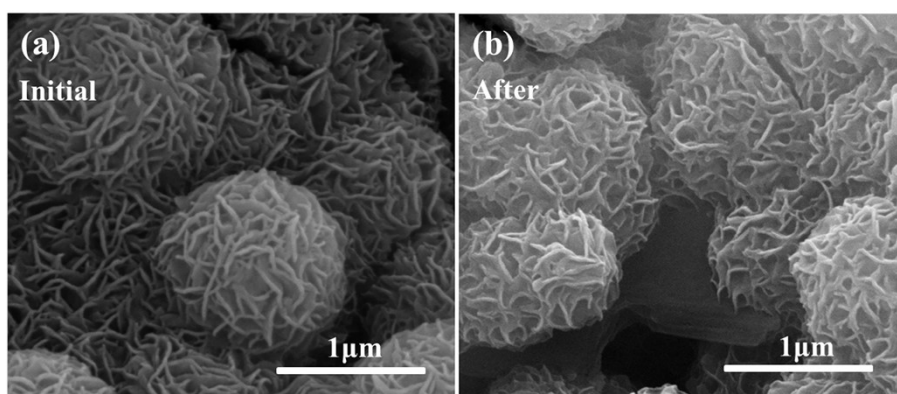

**Figure S7.** SEM images of the 1T-MoS<sub>2</sub>/NiCo<sub>2</sub>S<sub>4</sub>/CC composite (a) before and (b) after the chronoamperometry test for 24 h.
